# Supplementary material
Source: Springer Nature journal article supplement (https://www.springermedizin.de/resource/supplementary/12873_2011_164_MOESM4_ESM.pdf/9431566)

# Mean LOS (in hours) & % of LWBS

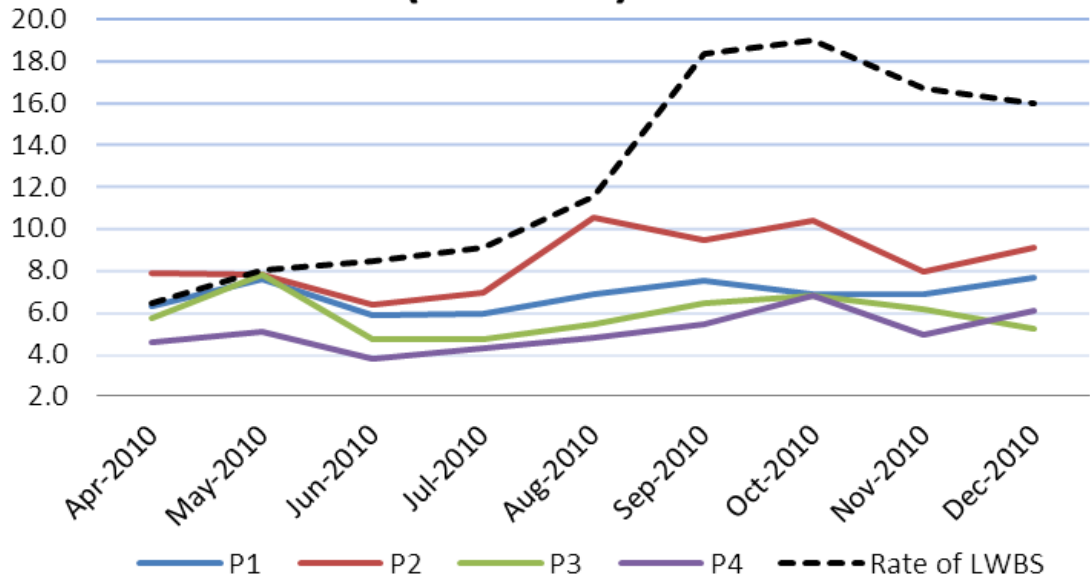

Supplement: MOESM4 [file 9431566]
